# Supplementary material for: Characterization, Comparative Analysis and Phylogenetic Implications of Mitogenomes of Fulgoridae (Hemiptera: Fulgoromorpha)
Source: MDPI journal article supplement (doi:10.3390/genes12081185), 2021-07-30
Supplement: s1 [file s1]

**Table S1.** Mitogenomic organization of nine Fulgoridae mitochondrial genomes.  
*Dichoptera* sp. (D.); *Limois* sp. (L.); *Neocalathous huangshanana* (N.).

| Gene             | Position          |                   | Size (bp)      | Codon       |             | Strand |
|------------------|-------------------|-------------------|----------------|-------------|-------------|--------|
|                  | From              | To                |                | Start       | Stop        |        |
| D./L./N.         |                   |                   |                |             |             |        |
| <i>trnI</i>      | 1/1/1             | 63/65/63          | 63/65/63       |             |             | +/+/+  |
| <i>trnQ</i>      | 66/72/72          | 134/140/414       | 69/69/70       |             |             | -/-/-  |
| <i>trnM</i>      | 134/140/141       | 197/204/204       | 64/65          |             |             | +/+/+  |
| <i>nad2</i>      | 198/205/205       | 1163/1167/1143    | 966/963/939    | ATT/ATT/ATT | TAA/TAA/TAA | +/+/+  |
| <i>trnW</i>      | 1162/1174/1202    | 1229/1236/1269    | 68/63/68       |             |             | +/+/+  |
| <i>trnC</i>      | 1222/1229/1262    | 1287/1290/1329    | 66/62/68       |             |             | -/-/-  |
| <i>trnY</i>      | 1290/1293/1332    | 1351/1356/1394    | 62/64/63       |             |             | -/-/-  |
| <i>cox1</i>      | 1357/1360/1409    | 2895/2899/2947    | 1539/1539/1539 | ATG/ATG/ATG | TAA/TAA/TAA | +/+/+  |
| <i>trnL2</i>     | 2891/2895/2943    | 2958/2959/3009    | 68/65/67       |             |             | +/+/+  |
| <i>cox2</i>      | 2959/2960/3010    | 3630/3631/3684    | 672/672/675    | ATA/ATA/ATA | TAA/TAA/TAA | +/+/+  |
| <i>trnK</i>      | 3637/3639/3694    | 3708/3709/3764    | 72/71/71       |             |             | +/+/+  |
| <i>trnD</i>      | 3713/3710/3765    | 3774/3772/3827    | 62/63/63       |             |             | +/+/+  |
| <i>atp8</i>      | 3775/3773/3828    | 3930/3931/3986    | 156/159/159    | ATT/ATT/ATC | TAA/TAA/TAA | +/+/+  |
| <i>atp6</i>      | 3924/3925/3980    | 4575/4576/4631    | 652/652/652    | ATG/ATG/ATG | T/T/T       | +/+/+  |
| <i>cox3</i>      | 4576/4577/4632    | 5356/5359/5414    | 781/783/783    | ATG/ATG/ATG | T/TAA/TAA   | +/+/+  |
| <i>trnG</i>      | 5357/5361/5422    | 5417/5425/5485    | 61/65/64       |             |             | +/+/+  |
| <i>nad3</i>      | 5418/5426/5486    | 5765/5773/5833    | 348/348/348    | ATT/ATT/ATA | TAA/TAA/TAA | +/+/+  |
| <i>trnA</i>      | 5766/5795/5837    | 5830/5858/5900    | 65/64/64       |             |             | +/+/+  |
| <i>trnR</i>      | 5831/5861/5901    | 5891/5922/5960    | 61/62/60       |             |             | +/+/+  |
| <i>trnN</i>      | 5894/5828/5963    | 5962/5991/6029    | 69/64/67       |             |             | +/+/+  |
| <i>trnS1</i>     | 5962/5991/6030    | 6021/6048/6087    | 60/58/67       |             |             | +/+/+  |
| <i>trnE</i>      | 6021/6050/6092    | 6076/6113/6152    | 56/64/61       |             |             | +/+/+  |
| <i>trnF</i>      | 6083/6112/6151    | 6149/6176/6215    | 67/65/65       |             |             | -/-/-  |
| <i>nad5</i>      | 6144/6167/6206    | 7805/7837/7879    | 1662/1671/1674 | ATT/ATG/ATA | TAA/TAG/TAG | -/-/-  |
| <i>trnH</i>      | 7817/7838/7893    | 7879/7899/7955    | 63/62/63       |             |             | -/-/-  |
| <i>nad4</i>      | 7870/7890/7937    | 9204/9224/9268    | 1335/1335/1332 | ATG/ATG/ATT | TAG/TAG/TAA | -/-/-  |
| <i>nad4L</i>     | 9198/9218/9274    | 9473/9493/9549    | 276/276/276    | ATG/ATG/ATG | TAA/TAG/TAA | -/-/-  |
| <i>trnT</i>      | 9480/9502/9569    | 9544/9567/9632    | 65/66/64       |             |             | +/+/+  |
| <i>trnP</i>      | 9550/9575/9636    | 9613/9638/9698    | 64/64/61       |             |             | -/-/-  |
| <i>nad6</i>      | 9618/9646/9698    | 10112/10140/10192 | 495/495/495    | ATA/ATT/ATT | TAA/TAA/TAA | +/+/+  |
| <i>cytb</i>      | 10119/10133/10203 | 11240/11251/11327 | 1122/1119/1125 | ATG/ATG/ATG | TAA/TAA/TAA | +/+/+  |
| <i>trnS2</i>     | 11240/11251/11353 | 11302/11312/11414 | 63/62/62       |             |             | +/+/+  |
| <i>nad1</i>      | 11305/11306/11426 | 12247/12250/12358 | 943/945/933    | ATG/ATG/ATG | T/TAA/TAA   | -/-/-  |
| <i>trnL1</i>     | 12249/12252/12360 | 12314/12314/12422 | 66/64/63       |             |             | -/-/-  |
| <i>rrnL</i>      | 12315/12315/12423 | 13532/13527/13635 | 1218/1213/1213 |             |             | -/-/-  |
| <i>trnV</i>      | 13533/13528/13636 | 13600/13591/13696 | 68/64/61       |             |             | -/-/-  |
| <i>rrnS</i>      | 13601/13592/13697 | 14334/14323/14428 | 734/732/732    |             |             | -/-/-  |
| A +T-rich region | 14335/14324/14429 | 15803/15957/16510 | 1469/1634/2082 |             |             | +/+/+  |

**Table S2.** Mitogenomic organization of nine Fulgoridae mitochondrial genomes.  
*Penthicodes atomaria* (Pea.); *Penthicodes caja* (Pec.); *Penthicodes variegata* (Pev.).

| Gene                  | Position          |                   | Size (bp)      | Codon       |             | Strand |
|-----------------------|-------------------|-------------------|----------------|-------------|-------------|--------|
|                       | From              | To                |                | Start       | Stop        |        |
| <i>Pea./Pec./Pev.</i> |                   |                   |                |             |             |        |
| <i>trnI</i>           | 1/1/1             | 64/64/64          | 64/64/64       |             |             | +/+/+  |
| <i>trnQ</i>           | 81/77/77          | 149/145/145       | 69/69/69       |             |             | -/-/-  |
| <i>trnM</i>           | 149/145/145       | 212/210/210       | 64/66/66       |             |             | +/+/+  |
| <i>nad2</i>           | 219/217/211       | 1184/1182/1179    | 966/966/969    | ATA/ATA/ATT | TAA/TAA/TAA | +/+/+  |
| <i>trnW</i>           | 1194/1188/1228    | 1256/1251/1291    | 63/64/64       |             |             | +/+/+  |
| <i>trnC</i>           | 1249/1244/1284    | 1311/1303/1344    | 63/60/61       |             |             | -/-/-  |
| <i>trnY</i>           | 1318/1311/1356    | 1379/1373/1420    | 62/63/65       |             |             | -/-/-  |
| <i>cox1</i>           | 1385/1390/1426    | 2923/2925/2961    | 1539/1536/1536 | ATG/ATG/ATG | TAA/TAA/TAA | +/+/+  |
| <i>trnL2</i>          | 2924/2929/2964    | 2987/2995/3027    | 64/67/64       |             |             | +/+/+  |
| <i>cox2</i>           | 2988/2996/3028    | 3659/3670/3702    | 672/675/675    | ATA/ATA/ATA | TAA/TAA/TAA | +/+/+  |
| <i>trnK</i>           | 3665/3673/3705    | 3734/3743/3774    | 70/71/70       |             |             | +/+/+  |
| <i>trnD</i>           | 3735/3744/3775    | 3796/3808/3840    | 62/65/66       |             |             | +/+/+  |
| <i>atp8</i>           | 3797/3809/3841    | 3958/3964/3996    | 162/156/156    | ATT/ATT/ATT | TAA/TAA/TAA | +/+/+  |
| <i>atp6</i>           | 3952/3958/3990    | 4603/4609/4641    | 652/652/652    | ATG/ATG/ATG | T/T/T       | +/+/+  |
| <i>cox3</i>           | 4604/4610/4642    | 5386/5392/5424    | 783/783/783    | ATG/ATG/ATG | TAA/TAA/TAA | +/+/+  |
| <i>trnG</i>           | 5407/5414/5441    | 5469/5477/5504    | 63/64/64       |             |             | +/+/+  |
| <i>nad3</i>           | 5470/5478/5505    | 5817/5825/5852    | 348/348/348    | ATT/ATT/ATT | TAG/TAA/TAA | +/+/+  |
| <i>trnA</i>           | 5816/5843/5876    | 5883/5907/5943    | 68/65/68       |             |             | +/+/+  |
| <i>trnR</i>           | 5887/5913/5968    | 5949/5978/6030    | 63/66/63       |             |             | +/+/+  |
| <i>trnN</i>           | 5954/5987/6041    | 6016/6053/6105    | 63/67/65       |             |             | +/+/+  |
| <i>trnS1</i>          | 6017/6054/6106    | 6073/6113/6163    | 57/60/58       |             |             | +/+/+  |
| <i>trnE</i>           | 6076/6116/6166    | 6137/6180/6232    | 62/65/67       |             |             | +/+/+  |
| <i>trnF</i>           | 6136/6179/6237    | 6199/6243/6302    | 64/65/66       |             |             | -/-/-  |
| <i>nad5</i>           | 6194/6241/6300    | 7867/7912/7971    | 1674/1672/1672 | ATG/ATG/ATG | TAG/T/T     | -/-/-  |
| <i>trnH</i>           | 7868/7898/7972    | 7930/7961/8034    | 63/64/63       |             |             | -/-/-  |
| <i>nad4</i>           | 7921/7967/8082    | 9261/9301/9359    | 1341/1335/1335 | ATG/ATG/ATT | TAG/TAG/TAG | -/-/-  |
| <i>nad4L</i>          | 9255/9307/9359    | 9530/9582/9634    | 276/276/276    | ATG/ATG/ATG | TAG/TAA/TAA | -/-/-  |
| <i>trnT</i>           | 9545/9590/9643    | 9611/9655/9776    | 67/66/64       |             |             | +/+/+  |
| <i>trnP</i>           | 9614/9663/9713    | 9676/9726/9776    | 63/64/64       |             |             | -/-/-  |
| <i>nad6</i>           | 9678/9758/9778    | 10181/10258/10281 | 504/501/504    | ATA/ATC/ATT | TAA/TAA/TAA | +/+/+  |
| <i>cytb</i>           | 10174/10239/10274 | 11292/11357/11395 | 1119/1119/1122 | ATG/ATG/ATG | TAG/TAA/TAG | +/+/+  |
| <i>trnS2</i>          | 11291/11343/11394 | 11352/11409/11456 | 62/67/63       |             |             | +/+/+  |
| <i>nad1</i>           | 11346/11418/11450 | 12269/12353/12370 | 924/936/921    | ATA/ATG/ATT | TAA/TAA/TAA | -/-/-  |
| <i>trnL1</i>          | 12298/12340/12402 | 12360/12403/12465 | 63/64/64       |             |             | -/-/-  |
| <i>rrnL</i>           | 12361/12404/12466 | 13575/13624/13689 | 1215/1221/1224 |             |             | -/-/-  |
| <i>trnV</i>           | 13576/13625/13690 | 13635/13686/13751 | 60/62/62       |             |             | -/-/-  |
| <i>rrnS</i>           | 13636/13687/13752 | 14365/14442/14487 | 730/756/736    |             |             | -/-/-  |
| A +T-rich region      | 14366/14443/14488 | 16093/16040/15814 | 1728/1598/1327 |             |             | +/+/+  |

**Table S3.** Mitogenomic organization of nine Fulgoridae mitochondrial genomes.  
*Pyrops clavatus* (Pyc.); *Pyrops lathburii* (Pyl.) and *Pyrops spinolae* (Pys.).

| Gene                  | Position          |                   | Size (bp)      | Codon       |             | Strand |
|-----------------------|-------------------|-------------------|----------------|-------------|-------------|--------|
|                       | From              | To                |                | Start       | Stop        |        |
| <i>Pyc./Pyl./Pys.</i> |                   |                   |                |             |             |        |
| <i>trnI</i>           | 1/1/1             | 64/64/64          | 64/64/64       |             |             | +/+/+  |
| <i>trnQ</i>           | 71/71/71          | 140/140/140       | 70/70/70       |             |             | -/-/-  |
| <i>trnM</i>           | 140/141/140       | 203/204/203       | 64/64/64       |             |             | +/+/+  |
| <i>nad2</i>           | 210/205/204       | 1178/1170/1172    | 969/966/969    | ATA/ATT/ATT | TAA/TAA/TAA | +/+/+  |
| <i>trnW</i>           | 1211/1193/1201    | 1280/1262/1269    | 70/70/69       |             |             | +/+/+  |
| <i>trnC</i>           | 1273/1255/1262    | 1337/1322/1329    | 65/68/68       |             |             | -/-/-  |
| <i>trnY</i>           | 1338/1323/1330    | 1400/1385/1392    | 63/63/63       |             |             | -/-/-  |
| <i>cox1</i>           | 1408/1397/1407    | 2946/2935/2945    | 1539/1539/1539 | ATG/ATG/ATG | TAA/TAA/TAA | +/+/+  |
| <i>trnL2</i>          | 2942/2931/2941    | 3008/2996/3006    | 67/66/66       |             |             | +/+/+  |
| <i>cox2</i>           | 3009/2997/3007    | 3683/3671/3681    | 675/675/675    | ATA/ATA/ATA | TAA/TAA/TAA | +/+/+  |
| <i>trnK</i>           | 3686/3674/3684    | 3756/3744/3754    | 71/71/71       |             |             | +/+/+  |
| <i>trnD</i>           | 3758/3745/3755    | 3820/3807/3817    | 63/63/63       |             |             | +/+/+  |
| <i>atp8</i>           | 3821/3808/3818    | 3976/3966/3979    | 156/159/162    | ATT/ATT/ATC | TAA/TAA/TAA | +/+/+  |
| <i>atp6</i>           | 3970/3960/3973    | 4621/4611/4624    | 652/652/652    | ATG/GTG/ATG | T/T/T       | +/+/+  |
| <i>cox3</i>           | 4622/4612/4625    | 5404/5394/5407    | 783/783/783    | ATG/ATG/ATG | TAA/TAA/TAA | +/+/+  |
| <i>trnG</i>           | 5413/5401/5408    | 5474/5463/5471    | 62/63/64       |             |             | +/+/+  |
| <i>nad3</i>           | 5475/5464/5472    | 5822/5811/5819    | 348/348/348    | ATA/ATT/ATT | TAA/TAA/TAG | +/+/+  |
| <i>trnA</i>           | 5850/5839/5846    | 5915/5909/5912    | 66/71/67       |             |             | +/+/+  |
| <i>trnR</i>           | 5921/5916/5920    | 5982/5979/5981    | 62/61/62       |             |             | +/+/+  |
| <i>trnN</i>           | 5985/5979/5984    | 6048/6043/6049    | 64/65/66       |             |             | +/+/+  |
| <i>trnS1</i>          | 6048/6043/6049    | 6106/6101/6108    | 59/59/60       |             |             | +/+/+  |
| <i>trnE</i>           | 6112/6105/6112    | 6172/6165/6173    | 61/61/62       |             |             | +/+/+  |
| <i>trnF</i>           | 6171/6164/6172    | 6234/6227/6235    | 64/64/64       |             |             | -/-/-  |
| <i>nad5</i>           | 6229/6218/6221    | 7902/7888/7894    | 1674/1671/1674 | ATA/ATC/ATA | TAG/TAG/TAA | -/-/-  |
| <i>trnH</i>           | 7916/7905/7908    | 7975/7965/7968    | 60/61/61       |             |             | -/-/-  |
| <i>nad4</i>           | 7966/7956/7959    | 9300/9290/9293    | 1335/1335/1335 | ATG/ATG/ATG | TAG/TAG/TAG | -/-/-  |
| <i>nad4L</i>          | 9294/9284/9287    | 9566/9559/9562    | 273/273/276    | ATT/ATG/ATG | TAG/TAA/TAG | -/-/-  |
| <i>trnT</i>           | 9608/9600/9599    | 9671/9669/9666    | 64/70/68       |             |             | +/+/+  |
| <i>trnP</i>           | 9677/9673/9670    | 9737/9733/9731    | 61/61/62       |             |             | -/-/-  |
| <i>nad6</i>           | 9739/9735/9733    | 10233/10229/10227 | 495/495/495    | ATT/ATT/ATC | TAA/TAA/TAA | +/+/+  |
| <i>cytb</i>           | 10249/10245/10243 | 11367/11363/11361 | 1119/1119/1119 | ATA/ATA/ATA | TAA/TAA/TAA | +/+/+  |
| <i>trnS2</i>          | 11367/11363/11361 | 11428/11424/11422 | 62/62/62       |             |             | +/+/+  |
| <i>nad1</i>           | 11439/11423/11432 | 12371/12364/12364 | 933/942/933    | ATG/GTG/ATG | TAA/TAA/TAA | -/-/-  |
| <i>trnL1</i>          | 12373/12366/12366 | 12435/12428/12428 | 63/63/63       |             |             | -/-/-  |
| <i>rrnL</i>           | 12436/12429/12429 | 13645/13640/13640 | 1210/1212/1212 |             |             | -/-/-  |
| <i>trnV</i>           | 13646/13641/13641 | 13705/13701/13701 | 60/61/61       |             |             | -/-/-  |
| <i>rrnS</i>           | 13706/13702/13702 | 14443/14432/14433 | 738/731/732    |             |             | -/-/-  |
| A +T-rich region      | 14444/14433/14434 | 16054/16104/16028 | 1611/1672/1595 |             |             | +/+/+  |

**Table S4.** Start and stop codons usage of nine Fulgoridae mitogenomes.

| Gene         | Start Codon / Stop Codon |           |           |             |             |             |             |             |             |
|--------------|--------------------------|-----------|-----------|-------------|-------------|-------------|-------------|-------------|-------------|
|              | <i>D.</i>                | <i>L.</i> | <i>N.</i> | <i>Pea.</i> | <i>Pec.</i> | <i>Pev.</i> | <i>Pyc.</i> | <i>Pyl.</i> | <i>Pys.</i> |
| <i>nad2</i>  | ATT/TAA                  | ATT/TAA   | ATT/TAA   | ATA/TAA     | ATA/TAA     | ATT/TAA     | ATA/TAA     | ATT/TAA     | ATT/TAA     |
| <i>cox1</i>  | ATG/TAA                  | ATG/TAA   | ATG/TAA   | ATG/TAA     | ATG/TAA     | ATG/TAA     | ATG/TAA     | ATG/TAA     | ATG/TAA     |
| <i>cox2</i>  | ATA/TAA                  | ATA/TAA   | ATA/TAA   | ATA/TAA     | ATA/TAA     | ATA/TAA     | ATA/TAA     | ATA/TAA     | ATA/TAA     |
| <i>atp8</i>  | ATT/TAA                  | ATT/TAA   | ATC/TAA   | ATT/TAA     | ATT/TAA     | ATT/TAA     | ATT/TAA     | ATT/TAA     | ATC/TAA     |
| <i>atp6</i>  | ATG/T                    | ATG/T     | ATG/T     | ATG/T       | ATG/T       | ATG/T       | ATG/T       | GTG/T       | ATG/T       |
| <i>cox3</i>  | ATG/TAA                  | ATG/TAA   | ATG/T     | ATG/TAA     | ATG/TAA     | ATG/TAA     | ATG/TAA     | ATG/TAA     | ATG/TAA     |
| <i>nad3</i>  | ATT/TAA                  | ATT/TAA   | ATA/TAA   | ATT/TAG     | ATT/TAA     | ATT/TAA     | ATA/TAA     | ATT/TAA     | ATT/TAG     |
| <i>nad5</i>  | ATT/TAA                  | ATG/TAG   | ATA/TAG   | ATG/TAG     | ATG/T       | ATG/T       | ATA/TAG     | ATC/TAG     | ATA/TAA     |
| <i>nad4</i>  | ATG/TAG                  | ATG/TAG   | ATT/TAA   | ATG/TAG     | ATG/TAG     | ATT/TAG     | ATG/TAG     | ATG/TAG     | ATG/TAG     |
| <i>nad4L</i> | ATG/TAA                  | ATG/TAA   | ATG/TAG   | ATG/TAG     | ATG/TAA     | ATG/TAA     | ATT/TAG     | ATG/TAA     | ATG/TAG     |
| <i>nad6</i>  | ATA/TAA                  | ATT/TAA   | ATT/TAA   | ATA/TAA     | ATC/TAA     | ATT/TAA     | ATT/TAA     | ATT/TAA     | ATC/TAA     |
| <i>cytb</i>  | ATG/TAA                  | ATG/TAA   | ATG/TAG   | ATG/TAA     | ATG/TAA     | ATG/TAG     | ATA/TAA     | ATA/TAA     | ATA/TAA     |
| <i>nad1</i>  | ATG/TAA                  | ATG/TAA   | ATG/T     | ATA/TAA     | ATG/TAA     | ATT/TAA     | ATG/TAA     | GTG/TAA     | ATG/TAA     |

**Table S5.** Best partitioning scheme and models used in this study.

| Data matrix | Subset Partitions                                                                           | Best Model |
|-------------|---------------------------------------------------------------------------------------------|------------|
| ML          | P1: ( <i>cox3_codon1</i> , <i>atp6_codon1</i> , <i>cox2_codon1</i> , <i>cytb_codon1</i> )   | GTR+I+G    |
|             | P2: ( <i>cox3_codon2</i> , <i>atp6_codon2</i> , <i>cox2_codon2</i> , <i>cytb_codon2</i> )   | TVM+I+G    |
|             | P3: ( <i>nad6_codon3</i> , <i>atp6_codon3</i> )                                             | TRN+G      |
|             | P4: ( <i>nad2_codon1</i> , <i>nad3_codon1</i> , <i>nad6_codon1</i> , <i>atp8_codon1</i> )   | TIM+I+G    |
|             | P5: ( <i>nad2_codon2</i> , <i>nad3_codon2</i> , <i>atp8_codon2</i> , <i>nad6_codon2</i> )   | TVM+I+G    |
|             | P6: ( <i>atp8_codon3</i> , <i>cox2_codon3</i> , <i>cox3_codon3</i> , <i>nad3_codon3</i> )   | TIM+G      |
|             | P7: ( <i>cox1_codon1</i> )                                                                  | GTR+I+G    |
|             | P8: ( <i>cox1_codon2</i> )                                                                  | TVM+I+G    |
|             | P9: ( <i>cox1_codon3</i> , <i>cytb_codon3</i> )                                             | GTR+I+G    |
|             | P10: ( <i>nad1_codon1</i> , <i>nad4L_codon1</i> , <i>nad5_codon1</i> , <i>nad4_codon1</i> ) | GTR+I+G    |
|             | P11: ( <i>nad4L_codon2</i> , <i>nad1_codon2</i> , <i>nad5_codon2</i> , <i>nad4_codon2</i> ) | GTR+I+G    |
|             | P12: ( <i>nad1_codon3</i> )                                                                 | HKY+G      |
|             | P13: ( <i>nad2_codon3</i> )                                                                 | TIM+G      |
|             | P14: ( <i>nad5_codon3</i> , <i>nad4L_codon3</i> , <i>nad4_codon3</i> )                      | HKY+G      |
|             | P15: ( <i>rrnL</i> , <i>rrnS</i> )                                                          | GTR+I+G    |
| BI          | P1: ( <i>cox3_codon1</i> , <i>atp6_codon1</i> , <i>cox2_codon1</i> , <i>cytb_codon1</i> )   | GTR+I+G    |
|             | P2: ( <i>cox2_codon2</i> , <i>cytb_codon2</i> , <i>cox3_codon2</i> , <i>atp6_codon2</i> )   | GTR+I+G    |
|             | P3: ( <i>nad6_codon3</i> , <i>atp6_codon3</i> , <i>atp8_codon3</i> )                        | GTR+G      |
|             | P4: ( <i>nad2_codon1</i> , <i>atp8_codon1</i> , <i>nad3_codon1</i> , <i>nad6_codon1</i> )   | GTR+I+G    |
|             | P5: ( <i>nad2_codon2</i> , <i>nad3_codon2</i> , <i>atp8_codon2</i> , <i>nad6_codon2</i> )   | GTR+I+G    |
|             | P6: ( <i>cox1_codon1</i> )                                                                  | GTR+I+G    |
|             | P7: ( <i>cox1_codon2</i> )                                                                  | GTR+I+G    |
|             | P8: ( <i>cytb_codon3</i> , <i>cox1_codon3</i> )                                             | GTR+I+G    |
|             | P9: ( <i>nad3_codon3</i> , <i>cox2_codon3</i> , <i>cox3_codon3</i> )                        | GTR+G      |
|             | P10: ( <i>nad1_codon1</i> , <i>nad5_codon1</i> , <i>nad4_codon1</i> , <i>nad4L_codon1</i> ) | GTR+I+G    |
|             | P11: ( <i>nad4L_codon2</i> , <i>nad1_codon2</i> , <i>nad5_codon2</i> , <i>nad4_codon2</i> ) | GTR+I+G    |
|             | P12: ( <i>nad1_codon3</i> )                                                                 | HKY+G      |
|             | P13: ( <i>nad2_codon3</i> )                                                                 | GTR+G      |
|             | P14: ( <i>nad5_codon3</i> , <i>nad4_codon3</i> , <i>nad4L_codon3</i> )                      | HKY+G      |
|             | P15: ( <i>rrnL</i> , <i>rrnS</i> )                                                          | GTR+I+G    |
